# Supplementary material for: Reactive and non-reactive species formed during the methanolysis of NaBH4: a theoretical and experimental approach
Source: Royal Society of Chemistry journal article supplement (doi:10.1039/d3re00007a), 2023-01-01
Supplement: d3re00007a1.pdf [file d3re00007a1.pdf]

Submitted to Reaction Chemistry and Engineering, 2023.

## Supplementary Material

### **“Reactive and non-reactive species formed during the methanolysis of NaBH<sub>4</sub>: A theoretical and experimental approach”**

*By*

*Alejandro Vallejo Orrego<sup>a</sup>, Cristián A. Ferretti<sup>b\*</sup> and Verónica K. Díez<sup>a</sup>*

<sup>a</sup> Catalysis Science and Engineering Research Group (GICIC), INCAPE, UNL-  
CONICET, CCT CONICET Santa Fe, Colectora Ruta Nac. 168, km 0, Paraje "El  
Pozo", (3000) Santa Fe, Argentina

<sup>b</sup> Fester Laboratory of Organic Chemistry, Institute of Applied Chemistry of  
Litoral, IQAL, UNL-CONICET, Santiago del Estero 2829, (3000) Santa Fe, Argentina

\*Corresponding author. Tel.: +54-342-4571164, Ex 2554; Fax: +54-342-4571162.  
E-mail address: cferretti@fiq.unl.edu.ar (C.A. Ferretti)

## Caption to Figures

**Figure S1.** Deconvolutions carried out for liquid samples obtained from NaBH<sub>4</sub> methanolysis tests performed with and without NaBH<sub>4</sub> for with *R* ratios varying from 0 to 6 (*R*=0 with NaBH<sub>4</sub> corresponds to a NaBH<sub>4</sub>/THF solution and *R*=0 without NaBH<sub>4</sub> corresponds to pure THF).

**Figure S2.** Evolution of *Y* for 1053 cm<sup>-1</sup> and 1090 cm<sup>-1</sup> (THF ring strain) bands for liquid samples as a function of *R* for methanolysis tests carried out with and without NaBH<sub>4</sub>.

**Figure S3.** Effect of the presence of the methanol solvent on the theoretical IR spectra of the different anionic (A) and neutral (B) species.

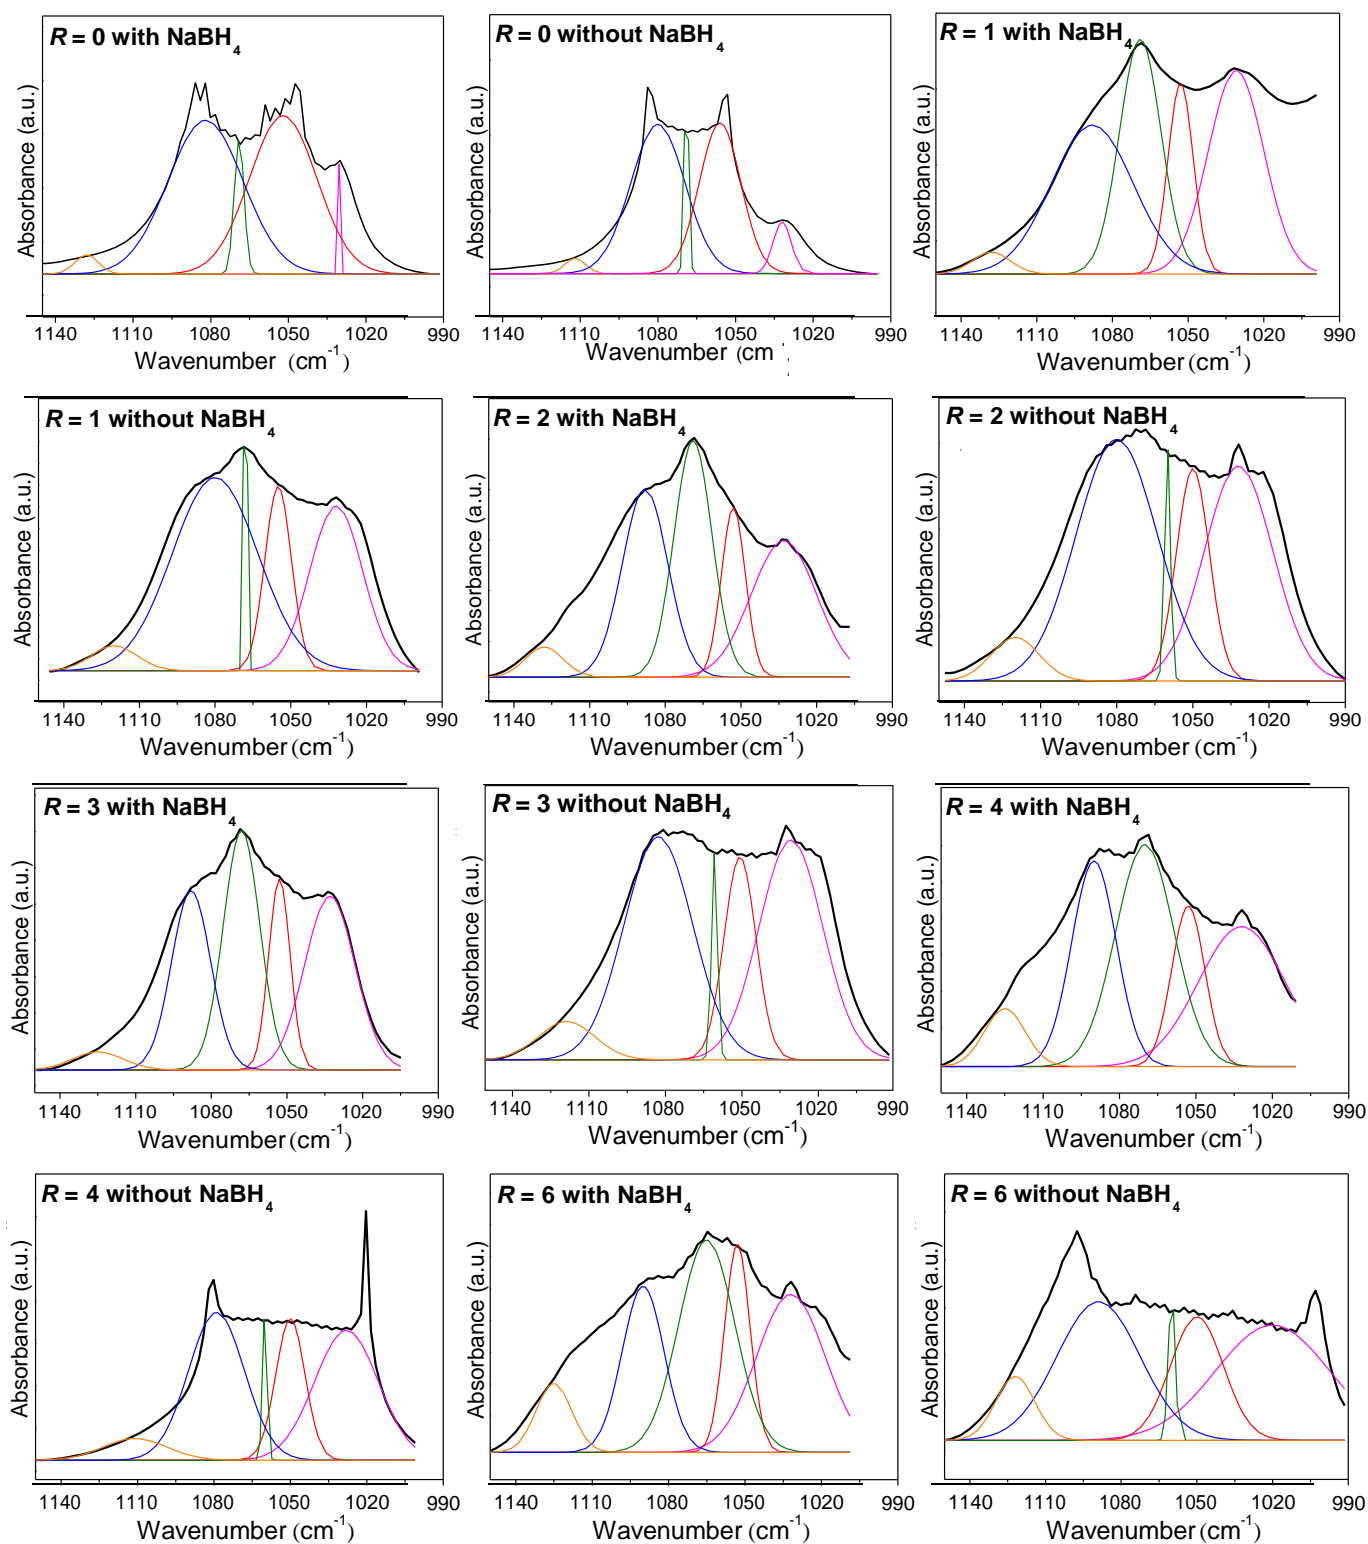

**Figure S1.** Deconvolutions carried out for liquid samples obtained from NaBH<sub>4</sub> methanolysis tests performed with and without NaBH<sub>4</sub> for with R ratios varying from 0 to 6 (R=0 with NaBH<sub>4</sub> corresponds to a NaBH<sub>4</sub>/THF solution and R=0 without NaBH<sub>4</sub> corresponds to pure THF).

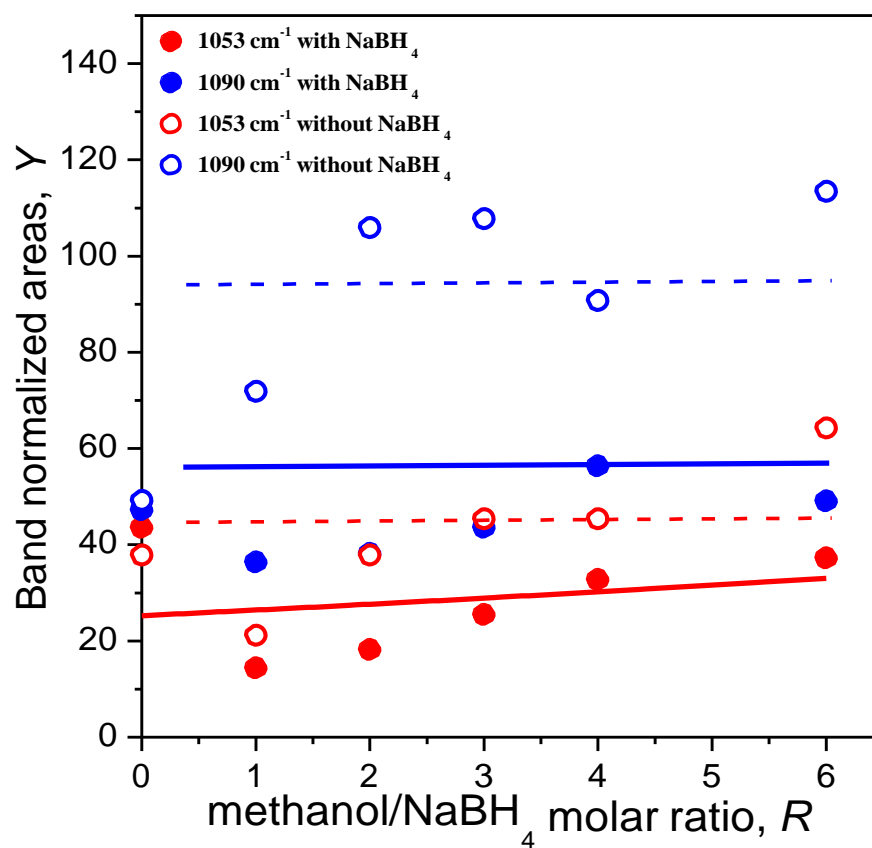

**Figure S2.** Evolution of  $Y$  for 1053 cm<sup>-1</sup> and 1090 cm<sup>-1</sup> (THF ring strain) bands for liquid samples as a function of  $R$  for methanolysis tests carried out with and without NaBH<sub>4</sub>.

**Table S1.** Theoretical calculations of the interaction of neutral species with methanol.

| Reacción                                                                                                                      | $\Delta E$<br>(Kcal/mol) |
|-------------------------------------------------------------------------------------------------------------------------------|--------------------------|
| $\text{Na}[\text{BH}_4] + \text{CH}_3\text{OH} \rightarrow \text{Na}[\text{BH}_3(\text{OCH}_3)] + \text{H}_2$                 | 175.89                   |
| $\text{Na}[\text{BH}_3(\text{OCH}_3)] + \text{CH}_3\text{OH} \rightarrow \text{Na}[\text{BH}_2(\text{OCH}_3)_2] + \text{H}_2$ | 135.05                   |
| $\text{Na}[\text{BH}_2(\text{OCH}_3)_2] + \text{CH}_3\text{OH} \rightarrow \text{Na}[\text{BH}(\text{OCH}_3)_3] + \text{H}_2$ | 147.68                   |
| $\text{Na}[\text{BH}(\text{OCH}_3)_3] + \text{CH}_3\text{OH} \rightarrow \text{Na}[\text{B}(\text{OCH}_3)_4] + \text{H}_2$    | 147.83                   |

<sup>a</sup> calculated by Eq. 5

**Table S2.** Assignments obtained from DFT calculations of vibrational modes of bonds present in the species studied.

| Assignments                                 | Anionic species                 |                                                    |                                                                  |                                                    |                                                   | Neutral species   |                                         |                                                       |                                         |                                        |
|---------------------------------------------|---------------------------------|----------------------------------------------------|------------------------------------------------------------------|----------------------------------------------------|---------------------------------------------------|-------------------|-----------------------------------------|-------------------------------------------------------|-----------------------------------------|----------------------------------------|
|                                             | [BH <sub>4</sub> ] <sup>-</sup> | [BH <sub>3</sub> (OCH <sub>3</sub> )] <sup>-</sup> | [BH <sub>2</sub> (OCH <sub>3</sub> ) <sub>2</sub> ] <sup>-</sup> | [BH(OCH <sub>3</sub> ) <sub>3</sub> ] <sup>-</sup> | [B(OCH <sub>3</sub> ) <sub>4</sub> ] <sup>-</sup> | NaBH <sub>4</sub> | Na[BH <sub>3</sub> (OCH <sub>3</sub> )] | Na[BH <sub>2</sub> (OCH <sub>3</sub> ) <sub>2</sub> ] | Na[BH(OCH <sub>3</sub> ) <sub>3</sub> ] | Na[B(OCH <sub>3</sub> ) <sub>4</sub> ] |
| $\nu(\text{C} - \text{H}_3)_{\text{as}}$    | -                               | 2846-2768                                          | 2870-2863                                                        | 2879-2876                                          | 2888-2879                                         | -                 | 2959-2871                               | 2968-2936                                             | 2982-2944                               | 2969-2931                              |
| $\nu(\text{C} - \text{H}_3)_{\text{s}}$     | -                               | 2765                                               | 2844                                                             | 2848-2846                                          | 2837-2833                                         | -                 | 2839                                    | 2862-2858                                             | 2892-2869                               | 2886-2882                              |
| $\nu(\text{C} - \text{H})$                  | -                               |                                                    | 2781                                                             | 2806-2801                                          | 2818-2814                                         | -                 |                                         | 2904                                                  | 2866                                    | 2869                                   |
| $\nu(\text{B} - \text{H})$                  | 2159-2157                       | 2219-2063                                          | 2161-2030                                                        | 2024                                               | -                                                 | 2176-2144         | 2142-1926                               | 2128-2003                                             | 2082                                    | -                                      |
| $\delta(\text{C} - \text{H}_3)_{\text{as}}$ | -                               | 1446                                               | 1453-1450                                                        | 1458-1454                                          | 1459                                              | -                 | 1450                                    | 1459-1454                                             | 1464-1455                               | 1469-1454                              |
| $\delta(\text{C} - \text{H}_3)_{\text{s}}$  | -                               | 1413                                               | 1423-1411                                                        | 1425                                               | 1420                                              | -                 | 1435-1429                               | 1439-1422                                             | 1442-1420                               | 1442-1422                              |
| $\nu(\text{B} - \text{O}_n)$                | -                               | -                                                  | 1167                                                             | 1168                                               | 1183-1169                                         | -                 | 1292                                    | 1184-1165                                             | 1191-1162                               | 1188-1164                              |
| $\rho(\text{C} - \text{H}_3)$               | -                               | 1131                                               | 1134                                                             | 1135                                               | 1137                                              | -                 | 1133                                    | 1138                                                  | 1138                                    | 1138                                   |
| $\delta(\text{B} - \text{H})$               | 1036                            | 1120-1107                                          | 1131-1086                                                        | 1133-1077                                          | -                                                 | 1140-1077         | 1034-1030                               | 1135-1063                                             | 1153-1103                               | -                                      |
| $\nu(\text{C} - \text{O})$                  | -                               | 1097                                               | 1104                                                             | 1110                                               | 1098-1085                                         | -                 | 1130                                    | 1046                                                  | 1068-1018                               | 1121-1098                              |
| $\delta(\text{B} - \text{O})$               | -                               | 925-915                                            | 919-838                                                          | 880                                                | 950                                               | -                 | 1194-1172                               | 1157-1115                                             | 1087-942                                | 1050-1021                              |
| $\nu(\text{B} - \text{O})$                  | -                               | 777                                                | 794                                                              | 880                                                | 892                                               | -                 | 920                                     | 896-712                                               | 775                                     | 878-863                                |
| $\nu(\text{B} - \text{-Na})$                | -                               | -                                                  | -                                                                | -                                                  | -                                                 | 419               | 303                                     | 308                                                   | 315                                     | 315                                    |

### **S3. Theoretical evaluation of vibrational frequencies with the effect of the solvent**

It is known that the presence of a given medium on a species, acting as a solvent, gives them an environment that fundamentally affects the vibrational modes of the bonds in the species. To evaluate the effect of the solvent on the vibration frequencies of the species in anionic and neutral forms, theoretical calculations were carried out to analyze the influence of the presence of methanol on said species. Figure S3 shows the spectra of the different anionic and neutral species, in the absence and the presence of methanol. When analyzing the spectra of the anionic and neutral species, it is observed that regardless of the dielectric constant of the solvent, slight shifts of the main assignments of the vibration modes of the bonds are produced in all cases. Generically, both for the anionic species and the neutral species, it is observed in all cases that the assignments present at frequencies higher than  $2000\text{ cm}^{-1}$  present shifts towards higher frequencies; while the assignments present at frequencies lower than  $2000\text{ cm}^{-1}$  show a shift towards lower frequencies, except in the case of the  $[\text{BH}_4]^-$  and  $\text{NaBH}_4$  species. For anionic species, the shifts from solvent-free assignments are  $\approx 1\text{-}56\text{ cm}^{-1}$ ; while for neutral species these shifts present values of  $\approx 1\text{-}108\text{ cm}^{-1}$ . These shifts correspond to the range of modifications to be found in experimental tests carried out under different procedures and are of the order that can be found when evaluating different species in polar and protic solvents [1]. A very clear fact is presented when analyzing the effect of the solvent on the assignments, that qualitatively a notable increase in the intensity of the assignments is observed.

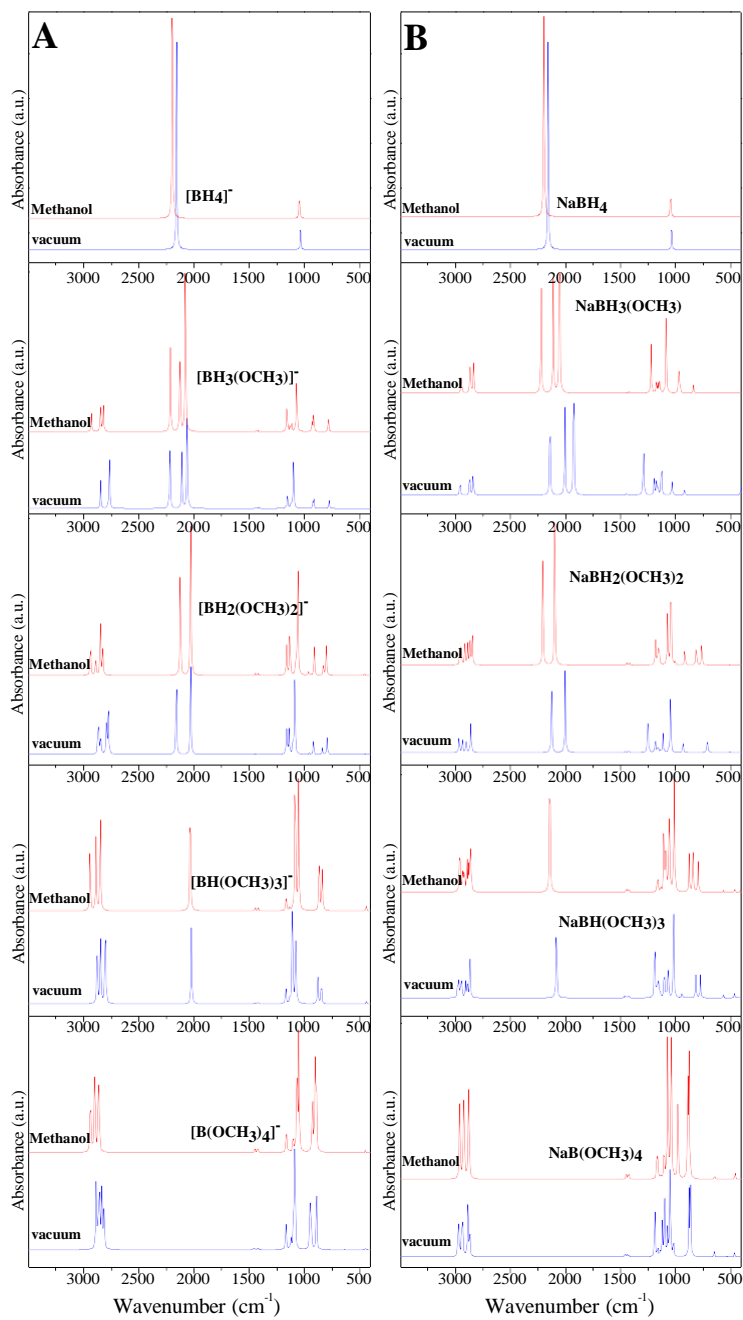

**Figure S3.** Effect of the presence of the methanol solvent on the theoretical IR spectra of the different anionic (A) and neutral (B) species.



## References

- [1] J.B. Foresman , Ae. Frisch, Exploring Chemistry With Electronic Structure Methods, 3rd ed., Gaussian Inc., Wallingford, CT, 2015.
